# Supplementary material for: Observation of proton-transfer-coupled spin transition by single-crystal neutron-diffraction measurement
Source: Royal Society of Chemistry journal article supplement (doi:10.1039/d3cp00527e), 2023-01-01
Supplement: d3cp00527e1.pdf [file d3cp00527e1.pdf]

## **Observation of Proton-Transfer-Coupled Spin Transition by Single-Crystal Neutron-Diffraction Measurement**

**Takumi Nakanishi, Yuta Hori, Yasuteru Shigeta, Hiroyasu Sato, Shu-Qi Wu, Ryoji Kiyonagi, Koji Munakata, Takashi Ohhara, and Osamu Sato\***

## Materials and Methods

### Materials

All reagents and solvents used in this study were purchased from TCI Co., Ltd., Wako Pure Chemical Industries Ltd., Alfa Aesar., and Sigma-Aldrich Chemical Co., and used without further purification. The ligand *N'*-(di(pyridin-2-yl)methylene)-3-methoxybenzohydrazide (HL-3OMe) was synthesized according to the previous report<sup>(S1)</sup>.

Synthesis of [Fe(HL-3OMe)<sub>2</sub>](HFDF)<sub>2</sub> (**[3OMe]**) (HFDF = 1,1,2,2,3,3-Hexafluoropropane-1,3-disulfonimide).

HL-3OMe (266 mg, 0.8 mmol) and FeCl<sub>2</sub> · 4H<sub>2</sub>O (79 mg, 0.4 mmol) were dissolved in ethanol (15 ml) in a glass bottle under a N<sub>2</sub> atmosphere. LiHFDF (240 mg, 0.8 mmol) was added to the ethanol solution containing HL-3OMe and FeCl<sub>2</sub> · 4H<sub>2</sub>O at about 45 °C. The resultant solution was capped tightly under N<sub>2</sub> atmosphere and kept in oven at 45 °C. Large black crystals of **[3OMe]** were obtained under a slow crystallization. (296 mg, 23%). C<sub>44</sub>H<sub>32</sub>F<sub>12</sub>FeN<sub>10</sub>O<sub>12</sub>S<sub>4</sub> (1304.86); calcd. C 40.50, H 2.47, N 10.73; found C 40.68, H 2.50, N 10.78.

### Magnetic property measurement

Magnetic susceptibility measurement for **[3OMe]** was conducted on a Quantum Design MPMS-5S superconducting quantum-interference device magnetometer under a 5-kOe field. The temperature sweeping rate in the measurement of single-crystal and polycrystalline sample was 3 K and 1 K min<sup>-1</sup>, respectively. The measurement samples were prepared by encapsulating each crystalline compound into a gelatin capsule.

### Differential scanning calorimetry (DSC)

DSC measurement was conducted on a SII Nanotechnology DSC6220 with a heating rate of 5 K min<sup>-1</sup>. The measurement sample was prepared by putting into aluminum pan.

### IR spectroscopy

The IR spectra of **[3OMe]** at 300 and 120 K were recorded using an FT-IR spectrophotometer (FT/IR-660 plus, Jasco) equipped with a helium-flow-type refrigerator (Helitran LT-3-110). Samples were prepared by depositing ground-powdered samples onto the CaF<sub>2</sub> plates.

### Single-crystal X-ray structure measurement

All single crystals for the X-ray measurements were coated with oil base cryoprotectant and mounted on nylon loops. Diffraction data were collected at 363 and 123 K under a nitrogen gas stream, respectively, on a Rigaku CCD or an HPC X-ray diffractometer, using multi-layer mirror monochromated Mo-K $\alpha$  radiation ( $\lambda = 0.71073 \text{ \AA}$ ). Intensity data were collected using a 0.5° oscillation angle. Bragg spots were integrated using the CrysAlis<sup>Pro</sup> program package, and the empirical absorption correction (multi-scan) was applied using the SCALE3 ABSPACK program. Structures were solved by direct methods (SHELX-S ver. 2013/1 and SHELXT Version 2014/4) and refined by full-matrix least-squares (SHELXL Version 2018/1). The hydrogen atoms that coordinated with carbon atoms in all crystal structures and those that coordinated with nitrogen atoms in the crystal structure at 363 K were placed at the calculated positions, and the riding models were refined and reapplied. The hydrogen atoms that coordinated with nitrogen atoms in the crystal structure at 123 K were placed on the basis of the Fourier map differences.

CCDC 2174214 (363 K) and 2174215 (123 K) contain the supplementary crystallographic data for this paper. These data can be obtained free of charge via <http://www.ccdc.cam.ac.uk/conts/retrieving.html> or from the CCDC (12 Union Road, Cambridge CB2 1EZ, UK; Fax: +44 1223 336033; E-mail: [deposit@ccdc.cam.ac.uk](mailto:deposit@ccdc.cam.ac.uk)).

### Single-crystal neutron diffraction

Single-crystal neutron diffraction data were collected using the single-crystal diffractometer SENJU at the beamline BL18 of the Materials and Life-Science Facility (MLF), Japan Proton Accelerator Research Complex (J-PARC), using the wavelength-resolved time-of-flight Laue diffraction method for wavelength ranging from 0.4 to 4.4 Å<sup>(S2)</sup>. A single crystal of **[3OMe]** (4.5 x 3.5 x 3.5 mm<sup>3</sup>) was mounted on an aluminum pin and attached to a closed-cycle helium cryostat. Then, diffraction data were acquired at 130 K under vacuum conditions. After the measurement at 130 K, the sample was re-mounted on a goniometer with a heater, and warmed up to 350 K. Since the original crystal broke during the transition from the LT to the HT phase, the diffraction measurement at 350 K was performed using a piece of the original crystal (2.5 x 2.0 x 1.5 mm<sup>3</sup>). Intensities of Bragg peaks were collected using 37 two-dimensional scintillation detectors to cover a wide area of reciprocal lattice space, and with 20 crystal orientations at 130 K and 22 orientations at 350 K, respectively. The exposure time for one crystal orientation was 2 hours at 130 K and 5 hours at 350 K, respectively. The accelerator power was 500 kW. Data reduction was performed using the STARGazer to obtain hkl indexes and the corresponding integrated intensities of reflections corrected for the detector efficiency, Lorentz factor, and scaling factor for

each crystal orientation<sup>(S3)</sup>. A least-squares refinement was performed using SHELXL with all reflections. Atomic coordinates resulting from X-ray crystal structure analyses at 130K and 350 K were used as initial structural models. All hydrogen atoms were determined using the nuclear difference Fourier map of the neutron data and refined anisotropically.

CCDC 2174216 (350 K) and 2174217 (130 K) contain the supplementary crystallographic data for this paper. These data can be obtained free of charge from The Cambridge Crystallographic Data Centre via [www.ccdc.cam.ac.uk/data\\_request/cif](http://www.ccdc.cam.ac.uk/data_request/cif).

## DFT calculation

All energy calculations for the complexes (<sup>HS</sup>[3OMe]<sub>Hyd</sub>, <sup>HS</sup>[3OMe]<sub>Py</sub>, <sup>LS</sup>[3OMe]<sub>Hyd</sub>, and <sup>LS</sup>[3OMe]<sub>Py</sub>) in the singlet and quintet spin states were carried out using restricted and unrestricted B3LYP\* functionals combined with the 6-311+G\*\* basis set implemented in the Gaussian 16 package<sup>S4</sup>. The B3LYP\* functional, developed by Reiher and co-workers<sup>S5</sup>, is a reparametrized version of the B3LYP functional with 15% Hartree–Fock exchange instead of 20% in the original B3LYP functional<sup>S6</sup>. The B3LYP\* functional was specifically developed to provide the best performance for accurate spin-state splitting while the original B3LYP functional results in the overestimation of HS stability. For comparison with the experimental results, the calculated vibrational frequencies were rescaled by the factor of 0.98 and represented with a Gaussian IR peak half-width at half height of 4 cm<sup>-1</sup>. The intensity of each vibration modes are given by calculating the corresponding oscillator strength.

## References

(S1) (a) Nakanishi, T. Hori, Y. Wu, S. Q. Sato, H. Okazawa, A. Kojima, N. Horie, Y. Okajima, H. Sakamoto, A. Shiota, Y. Yoshizawa, K. Sato, O. *Angew. Chem. Int. Ed.* **2020**, *132*, 14891. (b) T. Nakanishi, Y. Hori, H. Sato, S. Q. Wu, A. Okazawa, N. Kojima, T. Yamamoto, Y. Einaga, S. Hayami, Y. Horie, H. Okajima, A. Sakamoto, Y. Shiota, K. Yoshizawa, O. Sato, *J. Am. Chem. Soc.* **2019**, *141*, 14384–14393.

(S2) T. Ohhara, R. Kiyonagi, K. Oikawa, K. Kaneko, T. Kawasaki, I. Tamura, A. Nakao, T. Hanashima, K. Munakata, T. Moyoshi, T. Kuroda, H. Kimura, T. Sakakura, C. H. Lee, M. Takahashi, K. I. Ohshima, T. Kiyotani, Y. Noda, M. Arai, *J. Appl. Crystallogr.* **2016**, *49*, 120–127.

(S3) T. Ohhara, K. Kusaka, T. Hosoya, K. Kurihara, K. Tomoyori, N. Niimura, I. Tanaka, J. Suzuki, T. Nakatani, T. Otomo, S. Matsuoka, K. Tomita, Y. Nishimaki, T. Ajima, S. Ryufuku, *Nucl. Instrum. Methods Phys. Res. A* **2009**, *600*, 195–197.

(S4) Gaussian 16, Revision C.01, M. J. Frisch, G. W. Trucks, H. B. Schlegel, G. E. Scuseria, M. A. Robb, J. R. Cheeseman, G. Scalmani, V. Barone, G. A. Petersson, H. Nakatsuji, X. Li, M. Caricato, A. V. Marenich, J. Bloino, B. G. Janesko, R. Gomperts, B. Mennucci, H. P. Hratchian, J. V. Ortiz, A. F. Izmaylov, J. L. Sonnenberg, D. Williams-Young, F. Ding, F. Lipparini, F. Egidi, J. Goings, B. Peng, A. Petrone, T. Henderson, D. Ranasinghe, V. G. Zakrzewski, J. Gao, N. Rega, G. Zheng, W. Liang, M. Hada, M. Ehara, K. Toyota, R. Fukuda, J. Hasegawa, M. Ishida, T. Nakajima, Y. Honda, O. Kitao, H. Nakai, T. Vreven, K. Throssell, J. A. Montgomery, Jr., J. E. Peralta, F. Ogliaro, M. J. Bearpark, J. J. Heyd, E. N. Brothers, K. N. Kudin, V. N. Staroverov, T. A. Keith, R. Kobayashi, J. Normand, K. Raghavachari, A. P. Rendell, J. C. Burant, S. S. Iyengar, J. Tomasi, M. Cossi, J. M. Millam, M. Klene, C. Adamo, R. Cammi, J. W. Ochterski, R. L. Martin, K. Morokuma, O. Farkas, J. B. Foresman, and D. J. Fox, Gaussian, Inc., Wallingford CT, 2016.

(S5) (a) M. Reiher, O. Salomon, B. A. Hess, *Theor. Chem. Acc.* **2001**, *107*, 48–55. (b) O. Salomon, M. Reiher, B. A. Hess, *J. Chem. Phys.* **2002**, *117*, 4729–4737.

(S6) (a) A. D. Becke, *Phys. Rev. A.* **1988**, *38*, 3098–3100. (b) C. Lee, W. Yang, R. G. Parr, *Phys. Rev. B.* **1988**, *37*, 785–789. (c) A. D. Becke, *J. Chem. Phys.* **1993**, *98*, 5648–5652.

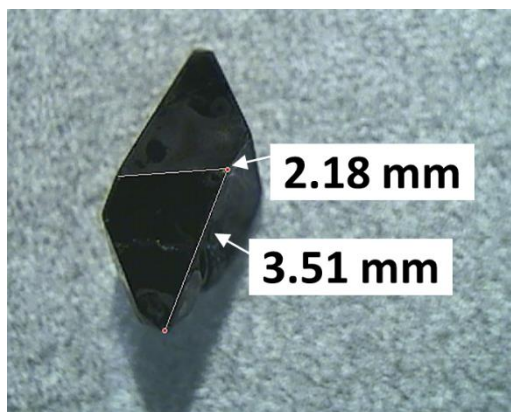

**Figure S1.** Size of the crystal viewed from the side.

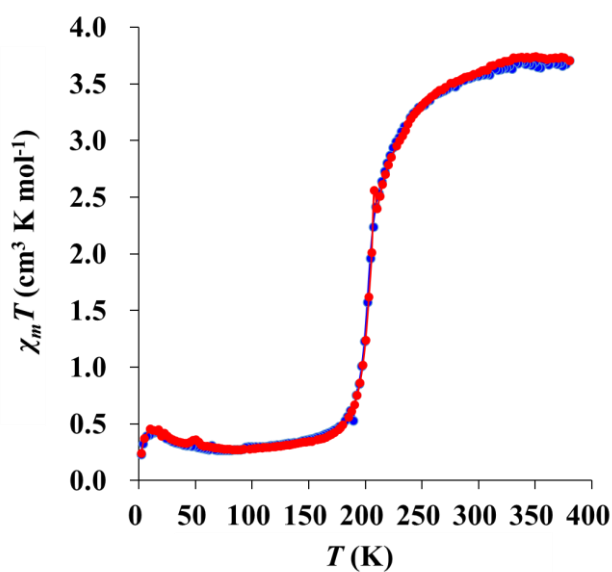

**Figure S2.** The  $\chi_m T$ - $T$  plot of the [3OMe] single-crystal. The red and blue curves were obtained in the heating and cooling processes, respectively. The  $\chi_m T$  values at 350 and 100 K were 3.73 and 0.28 cm<sup>3</sup> K mol<sup>-1</sup>, respectively. The relatively larger  $\chi_m T$  value in the entire temperature range compared with the measured value of the polycrystalline sample was likely due to magnetic anisotropy. The measured  $\chi_m T$  values of LT phase divided by HT phase for the single-crystal was 7.5%, which is similar to the polycrystalline sample. Based on these results, it is considered that the ratio of residual HS state in the LT phase is almost the same in both single-crystal and polycrystalline samples.

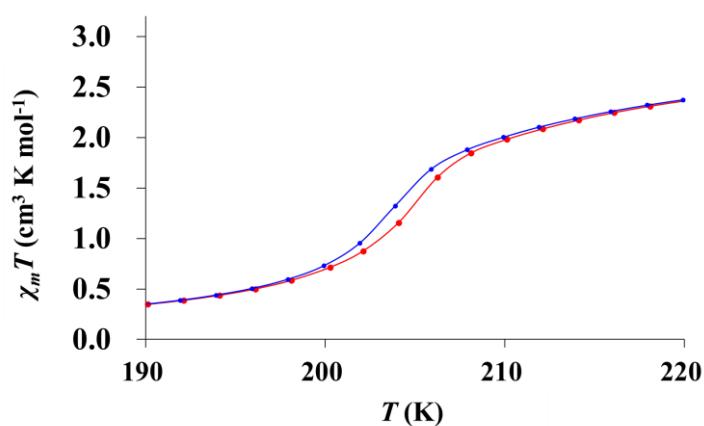

**Figure S3.** Enlarged view of the  $\chi_m T$ - $T$  plot of the [3OMe] polycrystalline sample. The blue and red line represent the cooling and heating process, respectively.

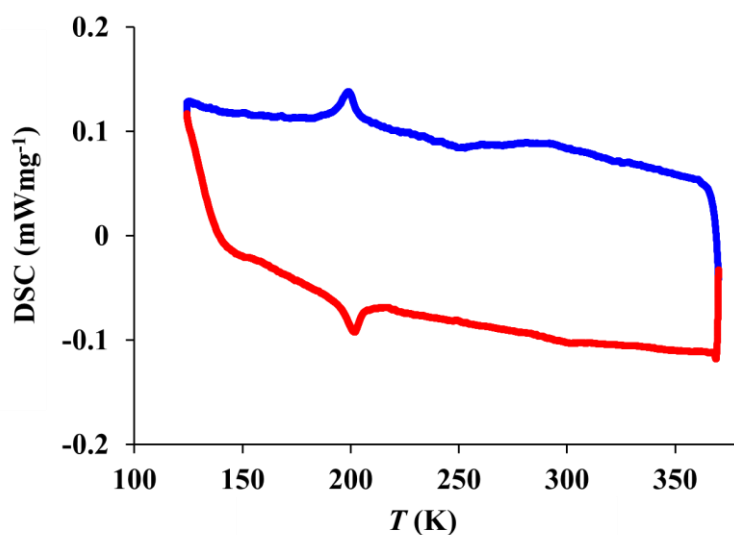

**Figure S4.** DSC curve of [3OMe]. The blue and red line represent the cooling and heating process.

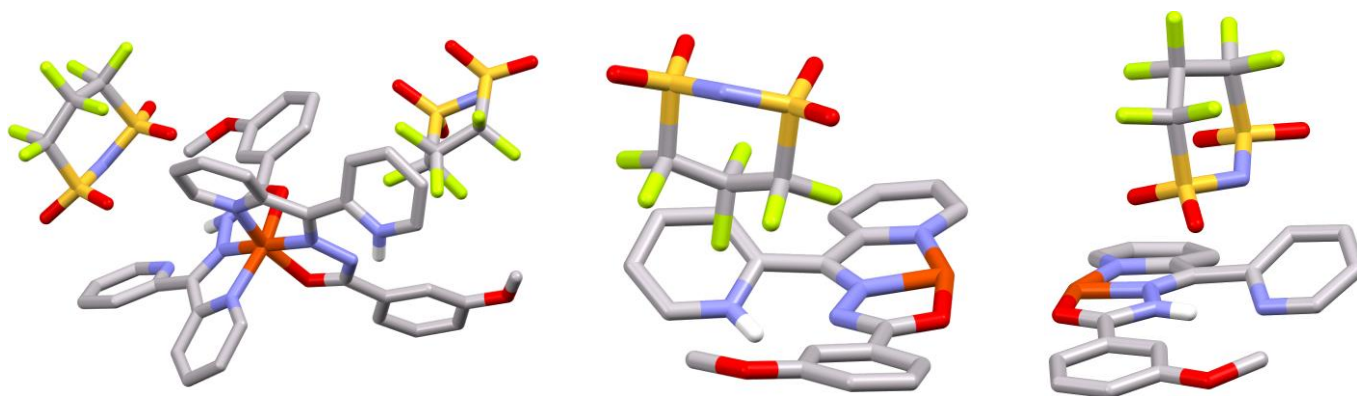

**Figure S5.** Overview of the orientation of HFDF anion around the Fe(II) complex in LT phase (left). The orientation of HFDF anion above the ligand that exhibits proton transfer (middle). The orientation of HFDF anion above the ligand that is unable to exhibit proton transfer (right).

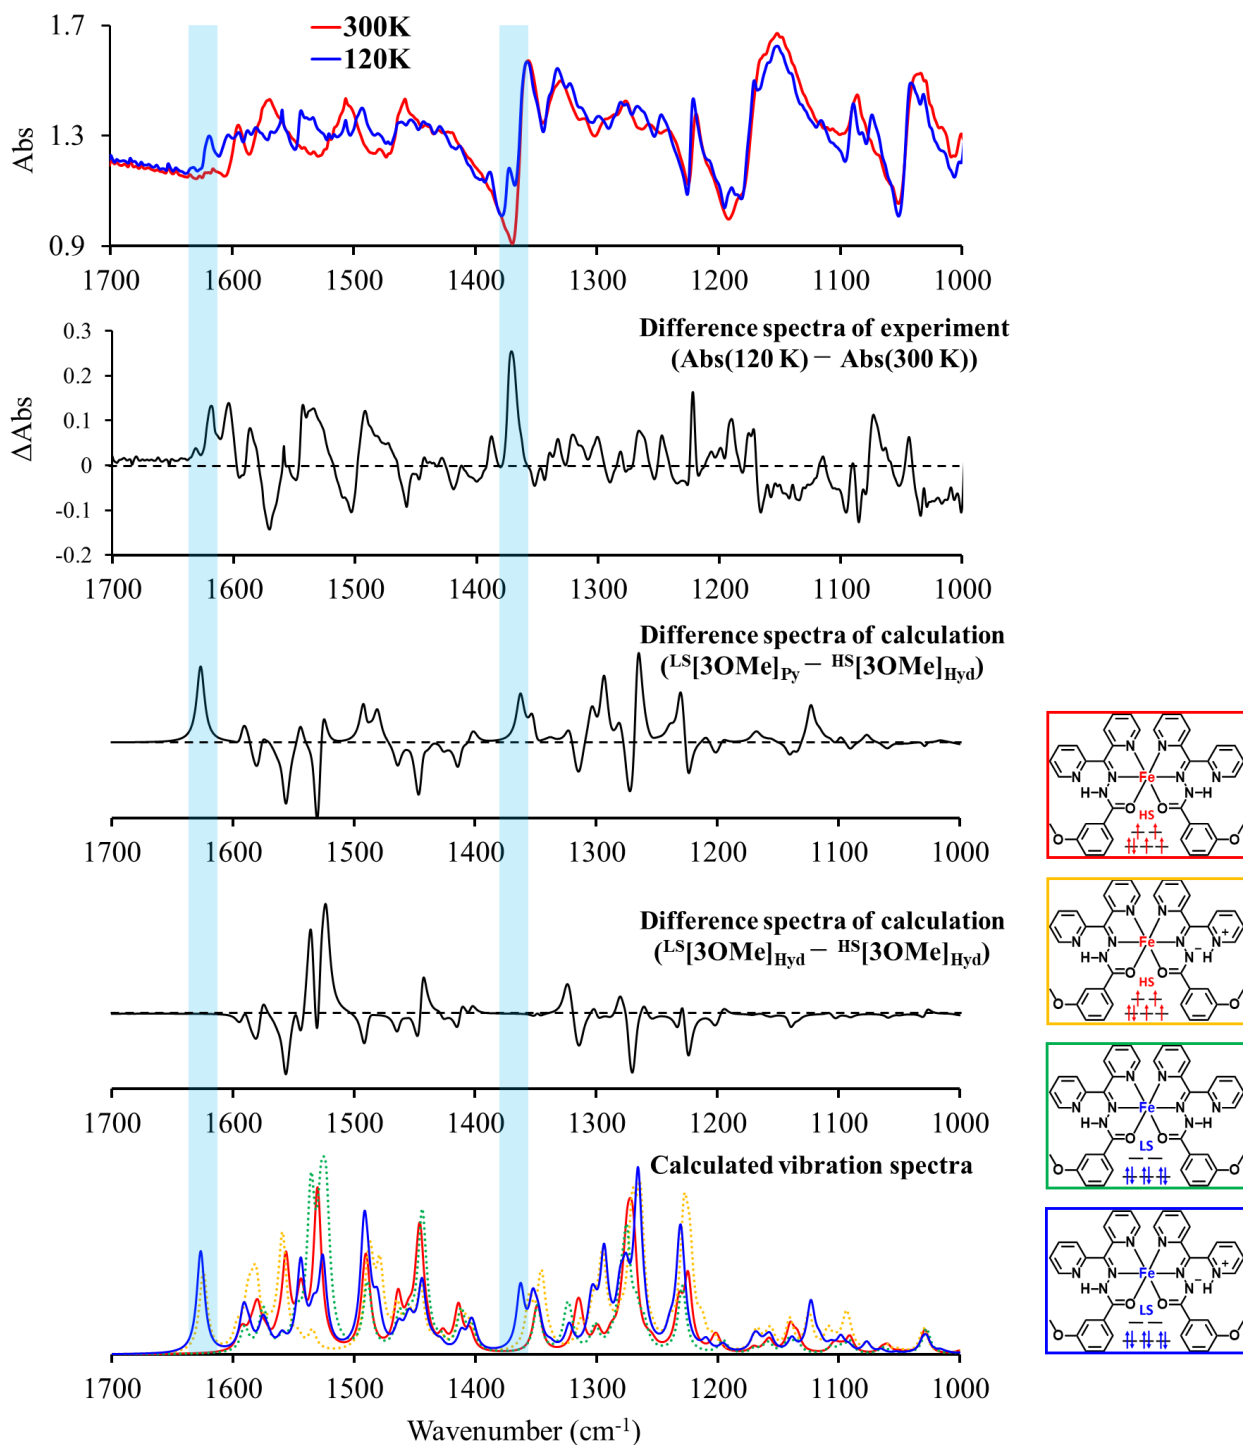

**Figure S6.** Variable temperature IR spectra, difference spectrum of 123 and 300 K ( $Abs_{(123\text{ K})} - Abs_{(300\text{ K})}$ ), simulated vibration spectra of four states ( $^{HS}[3OMe]_{Hyd}$ ,  $^{HS}[3OMe]_{Py}$ ,  $^{LS}[3OMe]_{Hyd}$ , and  $^{LS}[3OMe]_{Py}$ ) by DFT calculations at a scaling factor of 0.98, and difference spectrum of calculated results. The peak around  $1620\text{ cm}^{-1}$  is originated from the bending vibration of protonated pyridine ring ( $N_{Py}-H^+$ ). The peak around  $1370\text{ cm}^{-1}$  is originated from in-plane  $N_{Py}-H$  and  $C-H$  bending vibrations in the protonated pyridine ring coupled with the  $C-N_{Hyd}$  stretching and  $C-N_{Hyd}$  bending vibrations in the deprotonated hydrazone moiety.

In previous studies on PCST complexes, the peaks around  $1620$  and  $1370\text{ cm}^{-1}$  appeared with proton transfer from  $N_{Hyd}$  to  $N_{Py}$ , and these peaks were not found only with spin transition.<sup>S1</sup> The difference spectra of calculated results for  $^{LS}[3OMe]_{Py}$  and  $^{HS}[3OMe]_{Hyd}$  (PCST process) showed the appearance of the same characteristic peaks, which were not found in the difference spectra of calculated results for  $^{LS}[3OMe]_{Hyd}$  and  $^{HS}[3OMe]_{Hyd}$  (spin transition process). The experimental spectrum of **[3OMe]** showed peaks at around these frequency regions with cooling. These results suggest clearly the occurrence of proton transfer from  $N_{Hyd}$  to  $N_{Py}$  with spin transition from HS to LS states.

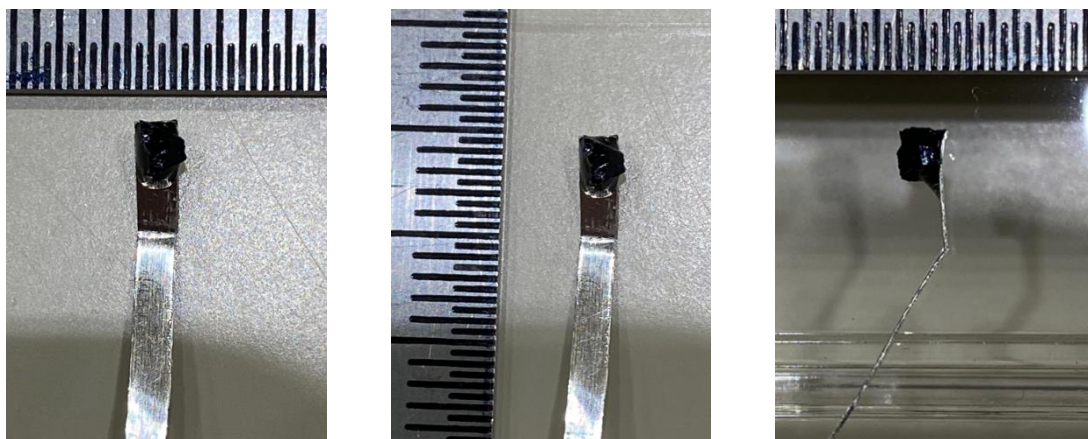

**Figure S7.** Size of the crystal used for the single-crystal neutron diffraction measurement at 350 K.

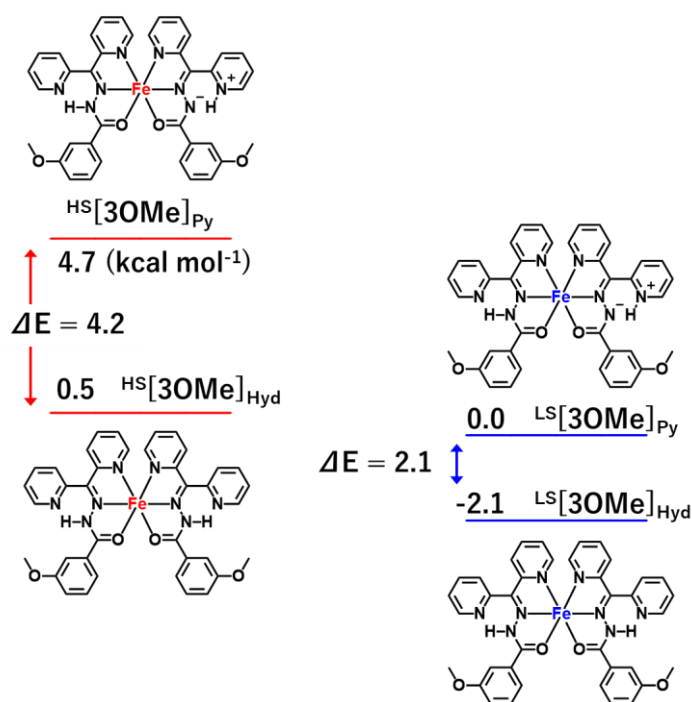

**Figure S8.** Computed energy diagram of four states ( $\text{HS}[30\text{Me}]_{\text{Hyd}}$ ,  $\text{HS}[30\text{Me}]_{\text{Py}}$ ,  $\text{LS}[30\text{Me}]_{\text{Hyd}}$  and  $\text{LS}[30\text{Me}]_{\text{Py}}$ ) by the DFT calculation. The units are in  $\text{kcal mol}^{-1}$ .

The DFT calculations showed that  $\text{HS}[30\text{Me}]_{\text{Hyd}}$  was more stable than  $\text{HS}[30\text{Me}]_{\text{Py}}$  by  $4.2 \text{ kcal mol}^{-1}$ , and in good agreement with the experimental observations. The calculated energy difference between  $\text{LS}[30\text{Me}]_{\text{Hyd}}$  and  $\text{LS}[30\text{Me}]_{\text{Py}}$  was decreased compared with the case in HS states, but the magnitude correlation was not consistent with the experimental results.  $\text{LS}[30\text{Me}]_{\text{Hyd}}$  was more energetically favorable than  $\text{LS}[30\text{Me}]_{\text{Py}}$  in the present calculation models and this tendency has also been confirmed in the reported PCST complexes.<sup>(S1)</sup> This inconsistency between the experimental and DFT calculation results occurred because the isolated molecule was calculated without considering the intermolecular interactions.

**Table S1.** Crystallographic parameters for the X-ray and neutron crystal structures of [3OMe].

| Data                               | Neutron                                                              |                                                                     | X-ray                                                               |                                                                     |
|------------------------------------|----------------------------------------------------------------------|---------------------------------------------------------------------|---------------------------------------------------------------------|---------------------------------------------------------------------|
|                                    | LT phase                                                             | HT phase                                                            | LT phase                                                            | HT phase                                                            |
| Temperature (K)                    | 130                                                                  | 350                                                                 | 123                                                                 | 363                                                                 |
| Empirical formula                  | C <sub>44</sub> H <sub>32</sub> F <sub>12</sub> Fe                   | C <sub>44</sub> H <sub>32</sub> F <sub>12</sub> Fe                  | C <sub>44</sub> H <sub>32</sub> F <sub>12</sub> Fe                  | C <sub>44</sub> H <sub>32</sub> F <sub>12</sub> Fe                  |
| Formula weight                     | 1304.88                                                              | 1304.88                                                             | 1304.88                                                             | 1304.88                                                             |
| Crystal system                     | monoclinic                                                           | monoclinic                                                          | monoclinic                                                          | monoclinic                                                          |
| Space group                        | P2 <sub>1</sub> /c                                                   | P2 <sub>1</sub> /c                                                  | P2 <sub>1</sub> /c                                                  | P2 <sub>1</sub> /c                                                  |
| a/Å                                | 17.090(3)                                                            | 17.84431(5)                                                         | 17.0591(6)                                                          | 17.9201(10)                                                         |
| b/Å                                | 17.886(2)                                                            | 18.07445(13)                                                        | 17.8559(4)                                                          | 18.1588(7)                                                          |
| c/Å                                | 18.179(3)                                                            | 18.68645(7)                                                         | 18.1668(7)                                                          | 18.7085(11)                                                         |
| α/°                                | 90                                                                   | 90                                                                  | 90                                                                  | 90                                                                  |
| β/°                                | 117.147(10)                                                          | 119.1357(2)                                                         | 117.356(5)                                                          | 119.419(8)                                                          |
| γ/°                                | 90                                                                   | 90                                                                  | 90                                                                  | 90                                                                  |
| Volume/Å <sup>3</sup>              | 4944.7(14)                                                           | 5264.28(5)                                                          | 4914.9(3)                                                           | 5302.9(6)                                                           |
| Z                                  | 4                                                                    | 4                                                                   | 4                                                                   | 4                                                                   |
| ρ <sub>calc</sub> /cm <sup>3</sup> | 1.753                                                                | 1.646                                                               | 1.763                                                               | 1.634                                                               |
| μ/mm <sup>-1</sup>                 | 1.594                                                                | 1.497                                                               | 0.598                                                               | 0.554                                                               |
| F(000)                             | 2640                                                                 | 2640                                                                | 2640.0                                                              | 2640.0                                                              |
| Radiation                          | Neutrons<br>(λ = 1.000)                                              | Neutrons<br>(λ = 1.000)                                             | MoKα<br>(λ = 0.71073)                                               | MoKα<br>(λ = 0.71073)                                               |
| 2θ range for data collection/°     | 4.946 to 101.61                                                      | 6.964 to 64.322                                                     | 5.004 to 50.7                                                       | 4.358 to 50.75                                                      |
| Index ranges                       | -25 ≤ h ≤ 26,<br>-26 ≤ k ≤ 27,<br>-27 ≤ l ≤ 27                       | -18 ≤ h ≤ 18,<br>-19 ≤ k ≤ 19,<br>-19 ≤ l ≤ 19                      | -20 ≤ h ≤ 20,<br>-20 ≤ k ≤ 21,<br>-20 ≤ l ≤ 21                      | -21 ≤ h ≤ 20,<br>-17 ≤ k ≤ 21,<br>-20 ≤ l ≤ 22                      |
| Reflections collected              | 64073                                                                | 26221                                                               | 23307                                                               | 43985                                                               |
| Independent reflections            | 17488<br>[R <sub>int</sub> = 0.1917,<br>R <sub>sigma</sub> = 0.1602] | 6210<br>[R <sub>int</sub> = 0.3045,<br>R <sub>sigma</sub> = 0.2193] | 8807<br>[R <sub>int</sub> = 0.0161,<br>R <sub>sigma</sub> = 0.0187] | 9705<br>[R <sub>int</sub> = 0.0212,<br>R <sub>sigma</sub> = 0.0193] |
| Data/restraints /parameters        | 17488/0/1036                                                         | 6210/0/1238                                                         | 8807/0/750                                                          | 9705/1081/1040                                                      |
| Goodness-of-fit on F <sup>2</sup>  | 1.053                                                                | 1.151                                                               | 1.032                                                               | 1.745                                                               |
| Final R indexes [I ≥ 2σ (I)]       | R <sub>1</sub> = 0.0654<br>wR <sub>2</sub> = 0.1259                  | R <sub>1</sub> = 0.1206<br>wR <sub>2</sub> = 0.2902                 | R <sub>1</sub> = 0.0429<br>wR <sub>2</sub> = 0.1141                 | R <sub>1</sub> = 0.1478,<br>wR <sub>2</sub> = 0.4104                |
| Final R indexes [all data]         | R <sub>1</sub> = 0.1400,<br>wR <sub>2</sub> = 0.1466                 | R <sub>1</sub> = 0.2435,<br>wR <sub>2</sub> = 0.3493                | R <sub>1</sub> = 0.0462,<br>wR <sub>2</sub> = 0.1166                | R <sub>1</sub> = 0.1753,<br>wR <sub>2</sub> = 0.4351                |



**Table S2.** Coordination distances, angles, and intramolecular hydrogen bond distances of [3OMe] obtained from single-crystal X-ray at 363 and 123 K and neutron diffraction measurement at 350 K and 130 K, and <sup>LS</sup>[3OMe]<sub>Py</sub> and <sup>HS</sup>[3OMe]<sub>Hy</sub> obtained from DFT calculations.

| Phase                 | Calculation                        |                                    | Neutron                          |                                  | X-ray                            |                                  |
|-----------------------|------------------------------------|------------------------------------|----------------------------------|----------------------------------|----------------------------------|----------------------------------|
|                       | —                                  | —                                  | LT phase                         | HT phase                         | LT phase                         | HT phase                         |
| Temperature (K)       | —                                  | —                                  | 130                              | 350                              | 123                              | 363                              |
| Abbreviation          | <sup>LS</sup> [3OMe] <sub>Py</sub> | <sup>HS</sup> [3OMe] <sub>Hy</sub> | <sup>LS</sup> [LT] <sub>Py</sub> | <sup>HS</sup> [HT] <sub>Hy</sub> | <sup>LS</sup> [LT] <sub>Py</sub> | <sup>HS</sup> [HT] <sub>Hy</sub> |
| Spin State            | LS                                 | HS                                 | LS                               | HS                               | LS                               | HS                               |
| Fe1–N1                | 1.983                              | 2.199                              | 1.965(1)                         | 2.146(8)                         | 1.965(2)                         | 2.153(6)                         |
| Fe1–N2                | 1.879                              | 2.157                              | 1.864(1)                         | 2.113(5)                         | 1.865(2)                         | 2.113(4)                         |
| Fe1–O1                | 1.969                              | 2.091                              | 1.950(2)                         | 2.09(1)                          | 1.951(2)                         | 2.082(4)                         |
| Fe1–N5                | 1.981                              | 2.218                              | 1.978(2)                         | 2.165(7)                         | 1.980(3)                         | 2.167(6)                         |
| Fe1–N6                | 1.894                              | 2.161                              | 1.876(1)                         | 2.094(5)                         | 1.868(2)                         | 2.086(4)                         |
| Fe1–O2                | 2.000                              | 2.158                              | 2.044(3)                         | 2.13(1)                          | 2.007(2)                         | 2.126(7)                         |
| (Fe–N) <sub>avg</sub> | 1.934                              | 2.183                              | 1.921                            | 2.129                            | 1.920                            | 2.130                            |
| (Fe–O) <sub>avg</sub> | 1.985                              | 2.124                              | 1.997                            | 2.11                             | 1.979                            | 2.104                            |
| C7–N4–C11             | 124.0                              | 118.7                              | 123.9(1)                         | 118.8(8)                         | 123.6(3)                         | 116.5(9)                         |
| C25–N8–C29            | 118.9                              | 118.7                              | 119.1(2)                         | 124.3(9)                         | 119.1(3)                         | 116(1)                           |
| N2–N3–C12             | 109.7                              | 115.0                              | 108.0(1)                         | 114.5(5)                         | 107.5(2)                         | 114.0(5)                         |
| N6–N7–C30             | 114.0                              | 115.8                              | 113.8(1)                         | 115.1(5)                         | 113.5(2)                         | 113.6(6)                         |
| N3 • • N4             | 2.582                              | 2.681                              | 2.690(2)                         | 2.735(8)                         | 2.681(3)                         | 2.714(8)                         |
| N3 • • H1             | 1.696                              | 1.029                              | 1.978(5)                         | 1.01(2)                          | 2.03(5)                          | —                                |
| N4 • • H1             | 1.052                              | 1.902                              | 1.032(4)                         | 1.99(2)                          | 0.89(5)                          | —                                |
| N7 • • N8             | 2.668                              | 2.682                              | 2.609(2)                         | 2.665(7)                         | 2.601(3)                         | 2.655(9)                         |
| N7 • • H2             | 1.033                              | 1.029                              | 1.042(3)                         | 1.08(2)                          | 0.82(5)                          | —                                |
| N8 • • H2             | 1.876                              | 1.906                              | 1.785(5)                         | 1.88(2)                          | 1.86(5)                          | —                                |

**Table S3.** Optimized coordinates for <sup>HS</sup>[3OMe]<sub>Hyd</sub>, <sup>HS</sup>[3OMe]<sub>Py</sub>, <sup>LS</sup>[3OMe]<sub>Hyd</sub>, and <sup>LS</sup>[3OMe]<sub>Py</sub>.

| <sup>HS</sup> [3OMe] <sub>Hyd</sub> |             |             |             |
|-------------------------------------|-------------|-------------|-------------|
| Fe                                  | -0.02299400 | -0.73796500 | 0.27503500  |
| O                                   | 0.96220700  | -0.28978500 | -1.51433300 |
| O                                   | -0.70442900 | 1.25702800  | 0.73680400  |
| N                                   | -2.10324800 | -0.63371600 | -0.30213100 |
| N                                   | -0.64559400 | -2.79306600 | -0.28039900 |
| N                                   | 2.06961200  | -0.52245800 | 0.75063100  |
| O                                   | 6.16457200  | 1.74614300  | -3.85849400 |
| N                                   | 0.22210100  | -1.24774300 | 2.40029100  |
| N                                   | -2.68076300 | 0.57647300  | -0.12945800 |
| H                                   | -3.58484600 | 0.71912100  | -0.59872900 |
| N                                   | 4.81307900  | -0.12818800 | 1.52699700  |
| O                                   | -5.54904200 | 4.87145900  | 0.57780700  |
| N                                   | 2.83167000  | -0.08055200 | -0.27866400 |
| H                                   | 3.84440200  | -0.02399700 | -0.10613800 |
| C                                   | -2.74563600 | -1.68740000 | -0.71876600 |
| C                                   | -1.85474400 | -2.87307200 | -0.89482500 |
| N                                   | -4.76324000 | -0.55695100 | -1.38318200 |
| C                                   | -1.86586400 | 1.56194300  | 0.39633500  |
| C                                   | 4.25170800  | 0.88970600  | -2.61509900 |
| H                                   | 4.74266400  | 1.03998700  | -1.66132300 |
| C                                   | 0.21468500  | -3.81039000 | -0.40593100 |
| H                                   | 1.16050200  | -3.70668600 | 0.11837500  |
| C                                   | -0.74147400 | -1.76955600 | 3.17048000  |
| H                                   | -1.73187100 | -1.82810800 | 2.72768200  |
| C                                   | 1.78818200  | -1.62753600 | 4.17977100  |
| H                                   | 2.80759600  | -1.60605400 | 4.54310700  |
| C                                   | 2.18647300  | -0.00822000 | -1.48853200 |
| C                                   | 1.47947400  | -1.13926300 | 2.90636900  |
| C                                   | 2.48892700  | -0.55626300 | 1.98461100  |
| C                                   | 3.81263800  | -0.05519600 | 2.43366500  |
| C                                   | -4.97147100 | -2.88256000 | -0.80496900 |
| H                                   | -4.52167400 | -3.79474900 | -0.43174300 |
| C                                   | -0.05738200 | -4.94751000 | -1.16588600 |
| H                                   | 0.67456200  | -5.74452700 | -1.23469300 |
| C                                   | 2.93517800  | 0.38359200  | -2.68427100 |
| C                                   | -4.20438800 | -1.72516800 | -0.99539300 |
| C                                   | -2.18268800 | -3.96483200 | -1.70024800 |
| H                                   | -3.12024500 | -3.98899300 | -2.24075700 |
| C                                   | -1.27157800 | -5.01334700 | -1.83727400 |
| H                                   | -1.51250700 | -5.86440000 | -2.46624400 |
| C                                   | 2.96869300  | 0.58597900  | -5.08869800 |
| H                                   | 2.48159200  | 0.47183700  | -6.05151100 |
| C                                   | -2.41114800 | 2.91790500  | 0.53139500  |
| C                                   | 4.91334500  | 1.24088400  | -3.79278900 |
| C                                   | -0.51698500 | -2.22983800 | 4.46505100  |
| H                                   | -1.33572600 | -2.63709900 | 5.04769500  |
| C                                   | 6.02834700  | 0.30092600  | 1.87805200  |
| H                                   | 6.80718800  | 0.20460800  | 1.12603800  |
| C                                   | 4.26322100  | 1.08025800  | -5.03145100 |
| H                                   | 4.80147600  | 1.36056600  | -5.93120200 |
| C                                   | 2.29196600  | 0.23924700  | -3.92041800 |
| H                                   | 1.27969500  | -0.14455100 | -3.95340600 |
| C                                   | -3.79655500 | 3.18063300  | 0.46850400  |
| H                                   | -4.51109700 | 2.37316400  | 0.36347300  |
| C                                   | 4.00133600  | 0.52527500  | 3.69501800  |
| H                                   | 3.17334700  | 0.64255700  | 4.38361100  |
| C                                   | 0.77865300  | -2.17496100 | 4.96826500  |
| H                                   | 1.00669700  | -2.55851100 | 5.95751600  |
| C                                   | 6.90313700  | 1.95416800  | -2.65520800 |

|   |             |             |             |
|---|-------------|-------------|-------------|
| H | 7.86304200  | 2.36405400  | -2.96690900 |
| H | 7.06743600  | 1.00709700  | -2.12591100 |
| H | 6.39643900  | 2.67325700  | -1.99984300 |
| C | -1.49672400 | 3.95975500  | 0.72831300  |
| H | -0.43768900 | 3.73752400  | 0.77723600  |
| C | 6.31088900  | 0.85291000  | 3.12846900  |
| H | 7.31621700  | 1.18452300  | 3.36466100  |
| C | -4.25119700 | 4.49430700  | 0.60017600  |
| C | -6.89713200 | -1.64897500 | -1.53395000 |
| H | -7.95271400 | -1.57619500 | -1.77262800 |
| C | -6.33814500 | -2.83694100 | -1.07504300 |
| H | -6.95347700 | -3.71892200 | -0.92834000 |
| C | -1.96470700 | 5.26796100  | 0.84323700  |
| H | -1.26363600 | 6.08411600  | 0.98393200  |
| C | 5.26981600  | 0.98755200  | 4.04092700  |
| H | 5.43762900  | 1.44741000  | 5.00964800  |
| C | -6.06931700 | -0.53171000 | -1.65964100 |
| H | -6.47173500 | 0.42253300  | -1.98958100 |
| C | -3.32380800 | 5.53755200  | 0.78060400  |
| H | -3.70438100 | 6.54937700  | 0.87620700  |
| C | -6.56493700 | 3.88376900  | 0.41172500  |
| H | -6.54750900 | 3.15594200  | 1.23228200  |
| H | -6.46100200 | 3.37054400  | -0.55267100 |
| H | -7.50907200 | 4.42682100  | 0.43094600  |

<sup>H</sup>S[3OMe]<sub>py</sub>

|    |             |             |             |
|----|-------------|-------------|-------------|
| Fe | 0.03844100  | -0.36837800 | 0.61874100  |
| O  | 1.06398800  | -1.06857700 | -0.99814800 |
| O  | -0.76447900 | 1.44147000  | -0.29704600 |
| N  | -2.01879400 | -0.78077100 | 0.12199000  |
| N  | -0.42988800 | -2.38228300 | 1.45355600  |
| N  | 2.07188200  | 0.25100200  | 0.86513100  |
| O  | 6.58019400  | -1.88794100 | -3.30435100 |
| N  | 0.13882100  | 0.61182100  | 2.56982500  |
| N  | -2.67613900 | 0.23573800  | -0.48001600 |
| H  | -3.57327800 | -0.00401100 | -0.92274800 |
| N  | 4.44285900  | 1.81055300  | 0.81856800  |
| O  | -5.87027700 | 3.85678800  | -2.43739300 |
| N  | 2.91088900  | -0.00238200 | -0.14519900 |
| C  | -2.57904400 | -1.90994100 | 0.44970400  |
| C  | -1.61110500 | -2.89529000 | 1.02133200  |
| N  | -4.64533900 | -1.56624900 | -0.73612100 |
| C  | -1.93824800 | 1.38337800  | -0.71183500 |
| C  | 4.50776900  | -1.29746000 | -2.16146700 |
| H  | 5.01351100  | -0.96284000 | -1.26531500 |
| C  | 0.49330900  | -3.21070400 | 1.95490000  |
| H  | 1.41534900  | -2.74927300 | 2.29641400  |
| C  | -0.83247000 | 0.56152800  | 3.49412300  |
| H  | -1.78104300 | 0.14370500  | 3.16870500  |
| C  | 1.60515800  | 1.54018400  | 4.22171600  |
| H  | 2.59698500  | 1.85904100  | 4.51654200  |
| C  | 2.29845900  | -0.78762700 | -1.08859700 |
| C  | 1.34890200  | 1.13298800  | 2.90584500  |
| C  | 2.35490100  | 1.12853100  | 1.81937600  |
| C  | 3.48141500  | 2.05682600  | 1.75836400  |
| C  | -4.71931300 | -3.06029900 | 1.14734300  |
| H  | -4.22196400 | -3.52079700 | 1.99253200  |
| C  | 0.31283900  | -4.59090000 | 2.03690500  |
| H  | 1.09270300  | -5.21873800 | 2.45318800  |
| C  | 3.09768200  | -1.28202900 | -2.21391800 |
| C  | -4.02354200 | -2.21064500 | 0.27644200  |
| C  | -1.84778900 | -4.27102400 | 1.03812900  |

|   |             |             |             |
|---|-------------|-------------|-------------|
| H | -2.76316100 | -4.67792900 | 0.62794000  |
| C | -0.87304900 | -5.12742100 | 1.55207000  |
| H | -1.04263600 | -6.19938800 | 1.56328200  |
| C | 3.15930500  | -2.22994500 | -4.43338500 |
| H | 2.64756900  | -2.58692800 | -5.32123900 |
| C | -2.58675900 | 2.48135700  | -1.44217000 |
| C | 5.22971400  | -1.79497900 | -3.24646000 |
| C | -0.66305500 | 1.00236600  | 4.80050500  |
| H | -1.48373300 | 0.94914200  | 5.50680800  |
| C | 5.51034200  | 2.60520500  | 0.60862300  |
| H | 6.18753600  | 2.29880300  | -0.18033700 |
| C | 4.54632000  | -2.25192500 | -4.38869300 |
| H | 5.13272900  | -2.62549700 | -5.22202200 |
| C | 2.42435000  | -1.75717300 | -3.34744200 |
| H | 1.34142900  | -1.74018000 | -3.37077200 |
| C | -3.98947500 | 2.57640800  | -1.56186700 |
| H | -4.63716800 | 1.86006100  | -1.07091200 |
| C | 3.61895000  | 3.23722700  | 2.51046700  |
| H | 2.84943900  | 3.52168300  | 3.21394400  |
| C | 0.59165200  | 1.47928400  | 5.17269400  |
| H | 0.78540500  | 1.78811900  | 6.19500700  |
| C | 7.35607200  | -1.49225500 | -2.17687700 |
| H | 8.39352500  | -1.68152100 | -2.45052000 |
| H | 7.09918500  | -2.08430000 | -1.28984200 |
| H | 7.22818900  | -0.42252900 | -1.96447400 |
| C | -1.75468500 | 3.44451800  | -2.02437100 |
| H | -0.68025200 | 3.35459300  | -1.91935700 |
| C | 5.69309200  | 3.74291600  | 1.36629900  |
| H | 6.55782200  | 4.37437700  | 1.20170900  |
| C | -4.54545300 | 3.64271800  | -2.27209100 |
| C | -6.69825300 | -2.66800400 | -0.15321600 |
| H | -7.74859000 | -2.83050000 | -0.36977900 |
| C | -6.07720200 | -3.28495100 | 0.92763000  |
| H | -6.63793400 | -3.93390700 | 1.59283500  |
| C | -2.32391100 | 4.49351700  | -2.74540100 |
| H | -1.68767400 | 5.23770700  | -3.21325200 |
| C | 4.71632900  | 4.06447800  | 2.31772900  |
| H | 4.80768000  | 4.97589700  | 2.90021100  |
| C | -5.94139500 | -1.80646200 | -0.94942700 |
| H | -6.39449000 | -1.28418500 | -1.78809500 |
| C | -3.70142500 | 4.59633000  | -2.87068800 |
| H | -4.15972000 | 5.41152100  | -3.42128500 |
| C | -6.80575800 | 2.95162700  | -1.85396300 |
| H | -6.70676600 | 2.92895500  | -0.76171200 |
| H | -6.68603600 | 1.94150700  | -2.26571800 |
| H | -7.79047700 | 3.33449000  | -2.11940500 |
| H | 4.20319800  | 0.99070000  | 0.19181500  |

<sup>55</sup>[3OMe]<sub>Hyd</sub>

|    |             |             |             |
|----|-------------|-------------|-------------|
| Fe | -0.04035300 | -0.71382000 | 0.19008600  |
| O  | 0.70536700  | 0.10263300  | -1.47570900 |
| O  | -0.50960700 | 1.11342300  | 0.85331700  |
| N  | -1.84909400 | -0.65174900 | -0.34945300 |
| N  | -0.17283400 | -2.47122000 | -0.71813300 |
| N  | 1.78030700  | -0.60110300 | 0.69290700  |
| O  | 5.91337200  | 2.56870000  | -3.31996600 |
| N  | -0.15141000 | -1.49195700 | 2.01467600  |
| N  | -2.49273300 | 0.50608400  | -0.03166400 |
| H  | -3.36493400 | 0.67996200  | -0.55670300 |
| N  | 4.50820200  | -0.54409500 | 1.54645600  |
| O  | -5.43975400 | 4.56302400  | 1.40327200  |
| N  | 2.58342200  | -0.02412000 | -0.24289700 |

|   |             |             |             |
|---|-------------|-------------|-------------|
| H | 3.59422100  | -0.05662300 | -0.04764800 |
| C | -2.39757800 | -1.64042500 | -1.01829900 |
| C | -1.39115300 | -2.68560600 | -1.31014900 |
| N | -4.39771500 | -0.46252900 | -1.63115500 |
| C | -1.69721600 | 1.43639000  | 0.59718000  |
| C | 3.99939200  | 1.45664600  | -2.30105400 |
| H | 4.46064900  | 1.44636800  | -1.32089500 |
| C | 0.81695300  | -3.35172600 | -0.92259200 |
| H | 1.75703700  | -3.13970600 | -0.42444700 |
| C | -1.21997500 | -2.05049400 | 2.59979600  |
| H | -2.15480700 | -1.98246000 | 2.05380300  |
| C | 1.19278200  | -2.20853400 | 3.87405100  |
| H | 2.16494900  | -2.30236200 | 4.33992700  |
| C | 1.94034000  | 0.33182900  | -1.40266700 |
| C | 1.05766400  | -1.53389400 | 2.65943600  |
| C | 2.16253900  | -0.89162600 | 1.91479100  |
| C | 3.50637000  | -0.58938400 | 2.45501500  |
| C | -4.55177700 | -2.85974700 | -1.54512200 |
| H | -4.10656000 | -3.81596400 | -1.29960700 |
| C | 0.67538800  | -4.47205400 | -1.73640700 |
| H | 1.50840000  | -5.15357800 | -1.86686700 |
| C | 2.69782800  | 0.94522100  | -2.49429200 |
| C | -3.82101800 | -1.66944200 | -1.42826500 |
| C | -1.57674300 | -3.76568500 | -2.17514600 |
| H | -2.51231800 | -3.88726600 | -2.70407800 |
| C | -0.53677200 | -4.66850700 | -2.38798900 |
| H | -0.67495500 | -5.50817100 | -3.06129800 |
| C | 2.77566900  | 1.57873500  | -4.81986100 |
| H | 2.31227400  | 1.62943600  | -5.79966700 |
| C | -2.25732000 | 2.74319100  | 0.94056300  |
| C | 4.67598400  | 2.03059200  | -3.37924100 |
| C | -1.15685500 | -2.69509300 | 3.83195900  |
| H | -2.05409300 | -3.12434200 | 4.26342800  |
| C | 5.74908800  | -0.28996600 | 1.97146300  |
| H | 6.52418900  | -0.27953200 | 1.20953600  |
| C | 4.05602000  | 2.08164200  | -4.64222700 |
| H | 4.60518500  | 2.53117500  | -5.46330100 |
| C | 2.08271500  | 1.01276300  | -3.75074400 |
| H | 1.08142400  | 0.61996500  | -3.87899600 |
| C | -3.65119700 | 2.96262800  | 0.98151100  |
| H | -4.34382100 | 2.14891900  | 0.80338500  |
| C | 3.72798800  | -0.30456000 | 3.80920200  |
| H | 2.90576500  | -0.26218200 | 4.51276200  |
| C | 0.07517200  | -2.79019200 | 4.46928900  |
| H | 0.17240700  | -3.31548900 | 5.41377800  |
| C | 6.61787200  | 2.57829700  | -2.07858300 |
| H | 7.57167300  | 3.06178700  | -2.28595500 |
| H | 6.79890200  | 1.55684700  | -1.72102600 |
| H | 6.07476900  | 3.15560300  | -1.32036100 |
| C | -1.36033400 | 3.77979000  | 1.22689600  |
| H | -0.29416200 | 3.59227300  | 1.18806000  |
| C | 6.06208600  | -0.04304300 | 3.30860500  |
| H | 7.08743700  | 0.15255900  | 3.60297200  |
| C | -4.13388400 | 4.23081900  | 1.31093600  |
| C | -6.45476000 | -1.55602700 | -2.21403700 |
| H | -7.48459800 | -1.46512400 | -2.54175000 |
| C | -5.88573100 | -2.79616800 | -1.94380400 |
| H | -6.47044700 | -3.70590400 | -2.03669900 |
| C | -1.85806100 | 5.04343500  | 1.54159200  |

|   |             |             |             |
|---|-------------|-------------|-------------|
| H | -1.17346700 | 5.85782400  | 1.75474000  |
| C | 5.02534600  | -0.02803200 | 4.23598100  |
| H | 5.21856000  | 0.20095800  | 5.27920600  |
| C | -5.67312900 | -0.41569800 | -2.02516300 |
| H | -6.08710000 | 0.57528700  | -2.19226200 |
| C | -3.22567600 | 5.27139300  | 1.58407500  |
| H | -3.62764900 | 6.24811400  | 1.83360400  |
| C | -6.43681300 | 3.57126600  | 1.15842100  |
| H | -6.35521800 | 2.74359100  | 1.87351500  |
| H | -6.37121700 | 3.19238000  | 0.13083600  |
| H | -7.39257900 | 4.07515100  | 1.29659400  |

<sup>15</sup>[3OMe]py

|    |             |             |             |
|----|-------------|-------------|-------------|
| Fe | -0.00343200 | -0.32028600 | 0.64884700  |
| O  | 0.75647600  | -0.94223200 | -1.05819100 |
| O  | -0.57512700 | 1.39227000  | -0.21200500 |
| N  | -1.79459100 | -0.76809900 | 0.22642000  |
| N  | -0.04031400 | -2.19413400 | 1.29194900  |
| N  | 1.78094600  | 0.22800600  | 0.86619100  |
| O  | 6.20332300  | -1.56217900 | -3.59046000 |
| N  | -0.16813200 | 0.45216900  | 2.46773600  |
| N  | -2.49377400 | 0.22303800  | -0.39276500 |
| H  | -3.34813500 | -0.08460900 | -0.88505800 |
| N  | 4.24859900  | 1.62679100  | 1.04267000  |
| O  | -5.64997500 | 3.91306800  | -2.29999600 |
| N  | 2.63906500  | -0.01251700 | -0.13571200 |
| C  | -2.27641700 | -1.96498700 | 0.47260700  |
| C  | -1.22059000 | -2.83982000 | 1.02792600  |
| N  | -4.29018200 | -1.70546200 | -0.80935300 |
| C  | -1.76099400 | 1.36265700  | -0.62648600 |
| C  | 4.16766300  | -1.08601000 | -2.33339400 |
| H  | 4.70305800  | -0.83076800 | -1.42850000 |
| C  | 0.99247000  | -2.89392500 | 1.78173200  |
| H  | 1.90126800  | -2.33380600 | 1.97314500  |
| C  | -1.21824600 | 0.36682600  | 3.29794900  |
| H  | -2.12161700 | -0.06578000 | 2.88131400  |
| C  | 1.12662300  | 1.38169500  | 4.25859700  |
| H  | 2.07887300  | 1.71346900  | 4.65051000  |
| C  | 1.99431200  | -0.67850600 | -1.14909500 |
| C  | 1.00355400  | 0.99686600  | 2.91928900  |
| C  | 2.07793300  | 1.01880000  | 1.90767200  |
| C  | 3.25670000  | 1.86843900  | 1.95382400  |
| C  | -4.35676800 | -3.31595400 | 0.97353100  |
| H  | -3.88692200 | -3.77688500 | 1.83353700  |
| C  | 0.93120100  | -4.26389600 | 2.01924100  |
| H  | 1.79574200  | -4.78206400 | 2.41850500  |
| C  | 2.75700000  | -1.06724500 | -2.34041300 |
| C  | -3.67764300 | -2.36283300 | 0.20210900  |
| C  | -1.32486600 | -4.22140600 | 1.20053400  |
| H  | -2.22952000 | -4.74067300 | 0.91455400  |
| C  | -0.24213800 | -4.93939200 | 1.70384700  |
| H  | -0.31669100 | -6.01374800 | 1.83664700  |
| C  | 2.74863900  | -1.80719900 | -4.63772000 |
| H  | 2.20870000  | -2.08246500 | -5.53787800 |
| C  | -2.38294800 | 2.48048600  | -1.33745900 |
| C  | 4.85516400  | -1.48028200 | -3.48193000 |
| C  | -1.17284500 | 0.79101400  | 4.62079400  |
| H  | -2.05319300 | 0.70902800  | 5.24791600  |
| C  | 5.37662700  | 2.35940100  | 0.94287600  |
| H  | 6.07059100  | 2.06355200  | 0.16466500  |
| C  | 4.13634900  | -1.83207200 | -4.63881300 |
| H  | 4.69573500  | -2.12678000 | -5.52086900 |

|   |             |             |             |
|---|-------------|-------------|-------------|
| C | 2.04818400  | -1.43517400 | -3.49148100 |
| H | 0.96511500  | -1.41781900 | -3.48079400 |
| C | -3.78510200 | 2.59566900  | -1.44833100 |
| H | -4.43716100 | 1.87884000  | -0.96397400 |
| C | 3.43628300  | 2.98197900  | 2.79689200  |
| H | 2.65145000  | 3.27555000  | 3.47848400  |
| C | 0.03101600  | 1.28578300  | 5.11223200  |
| H | 0.12478800  | 1.58318400  | 6.15167700  |
| C | 7.01511500  | -1.26109200 | -2.45955800 |
| H | 8.04350600  | -1.41852900 | -2.78309700 |
| H | 6.79130900  | -1.93038800 | -1.61955800 |
| H | 6.89033400  | -0.21458300 | -2.15086000 |
| C | -1.53767600 | 3.43699200  | -1.91264100 |
| H | -0.46383700 | 3.32845700  | -1.81990400 |
| C | 5.59643400  | 3.42211100  | 1.79141500  |
| H | 6.50843300  | 4.00165200  | 1.71572800  |
| C | -4.32897900 | 3.67900100  | -2.14180700 |
| C | -6.27526100 | -3.00463400 | -0.43747300 |
| H | -7.29163100 | -3.23806000 | -0.73530700 |
| C | -5.67229200 | -3.63737800 | 0.64464500  |
| H | -6.21697300 | -4.37023900 | 1.23148900  |
| C | -2.09603800 | 4.50499100  | -2.61380100 |
| H | -1.45184900 | 5.24639000  | -3.07505400 |
| C | 4.59337500  | 3.74158200  | 2.71733500  |
| H | 4.71275900  | 4.60181700  | 3.36855800  |
| C | -5.54713900 | -2.03134200 | -1.12242600 |
| H | -5.99038600 | -1.48802400 | -1.95292500 |
| C | -3.47272900 | 4.62906200  | -2.72992900 |
| H | -3.92152500 | 5.45840200  | -3.26711900 |
| C | -6.59711100 | 3.01218100  | -1.72636000 |
| H | -6.49583600 | 2.97407000  | -0.63489300 |
| H | -6.49180200 | 2.00640700  | -2.15186500 |
| H | -7.57681700 | 3.41219500  | -1.98457000 |
| H | 3.99940400  | 0.87933400  | 0.34516700  |
